# Supplementary material for: Linking Plant Nutritional Status to Plant-Microbe Interactions
Source: PLoS One. 2013 Jul 16;8(7):e68555. doi: 10.1371/journal.pone.0068555 (PMC3713015; doi:10.1371/journal.pone.0068555)
Supplement: Table S6 — Differentially expressed bacterial genes in the presence of iron-deficient maize root exudates in exponential (OD 1.0) and transient growth phase (OD 3.0). (XLSX) [file pone.0068555.s006.xlsx]

## Sheet: up_OD1.0
Gene ID	Gene and Function	M	Fold-change	p_value
RBAM_004030	hypothetical protein	1.82751	3.54925	0.00506524
RBAM_000330	csfB - hypothetical protein involved in the control of SigG activity	1.03295	2.0462	0.00479264
RBAM_012730	ykcB - conserved hypothetical protein	0.984595	1.97876	0.00530277
RBAM_018880	yobW - hypothetical protein involved in sporulation	0.937118	1.9147	0.0149625
RBAM_002460	ybxG - putative proline-specific permease	0.8813	1.84203	0.0178868
B_amylo_FZB42_3940	predicted ncRNA	0.821739	1.76753	0.0310976
RBAM_003840	yclF - putative di-tripeptide ABC transporter, permease	0.812318	1.75603	0.00182303

## Sheet: down_OD1.0
Gene ID	Gene and Function	M	Fold-change	p_value
RBAM_002540	yolA1 - hypothetical protein	-0.977647	1.96925	0.0304443
B_amylo_FZB42_3947	predicted ncRNA	-0.876125	1.83544	0.0411503

## Sheet: up_OD3.0
Gene ID	Gene and Function	M	Fold-change	p_value
RBAM_009310	yhcC - hypothetical protein	2.18403	4.54422	0.0526748
B_amylo_FZB42_3976	predicted ncRNA	2.0892	4.25513	0.00847264
RBAM_020820	trpC - indol-3-glycerol phosphate synthase involved in biosynthesis of tryptophan	1.72834	3.31347	0.000200863
RBAM_032970	ywtF - putative transcriptional regulator	1.58828	3.0069	0.00349702
RBAM_034790	hypothetical protein	1.4046	2.64744	0.0450584
RBAM_037980	rpsR - ribosomal protein S18 involved in translation	1.34935	2.54798	0.0449933
RBAM_006700	cotA - spore coat protein (outer) involved in resistance to the spore	1.28368	2.43459	5.53395e-05
RBAM_003930	yxeN - putative amino acid ABC transporter (permease)	1.25731	2.3905	0.0237523
RBAM_036390	abn2 - endo-1,5-alpha-L-arabinosidase involved in arabinan degradation	1.2504	2.37907	0.000197602
RBAM_030200	gerAC - nutrient receptor involved in germination response to L-alanine	1.23711	2.35726	5.52613e-05
RBAM_019100	yocS - putative sodium-dependent transporter	1.22342	2.335	0.0454325
RBAM_007100	yerO - putative transcription regulator (tetr/acrr family)	1.21381	2.3195	0.0379045
RBAM_016810	ymdB - conserved hypothetical protein	1.15803	2.23152	0.0261012
RBAM_002040	gabT1 - 4-aminobutyrate aminotransferase	1.08593	2.12274	1.8812e-05
RBAM_025310	leuD - isopropylmalate isomerase small subunit involved in biosynthesis of leucine	1.06716	2.09531	0.0014008
RBAM_022900	yqhH - putative SNF2 helicase	1.05324	2.07518	0.000323892
RBAM_024250	yybF1 - hypothetical transport protein	1.03214	2.04505	4.00951e-05
RBAM_002110	feuB - iron-uptake system permease protein involved in iron acquisition	1.0118	2.01643	6.62208e-05
RBAM_018780	yoaF - hypothetical protein YoaF	0.966988	1.95476	0.00175917
RBAM_027300	bceB - bacitracin export permease protein involved in bacitracin export	0.944794	1.92491	0.000565715
RBAM_023100	mgsR - transcriptional regulator which controls a subset of general stress genes	0.929373	1.90445	0.000565715
RBAM_015560	fmt - methionyl-tRNA formyltransferase involved in formylation of Met-tRNA(fMet)	0.927889	1.90249	6.62208e-05
RBAM_006520	hypothetical protein	0.924366	1.89785	0.0061788
RBAM_006840	purE - phosphoribosylaminoimidazole carboxylase involved in purine biosynthesis	0.922543	1.89545	0.00414586
RBAM_005430	yrkE - conserved hypothetical protein	0.919337	1.89125	0.0387741
RBAM_030670	cadA - cadmium transporting ATPase involved in cadmium export	0.906299	1.87423	0.0106593
RBAM_035400	qoxD - quinol oxidase subunit IV involved in respiration	0.904914	1.87243	0.00146365
RBAM_033490	ywqB - conserved hypothetical protein	0.884943	1.84669	0.00151624
RBAM_031130	yvbI - hypothetical protein	0.874688	1.83361	2.52031e-05
B_amylo_FZB42_3891	predicted ncRNA	0.865669	1.82218	0.0334472
RBAM_024270	yrhI - conserved hypothetical protein	0.859489	1.8144	0.053992
RBAM_009270	yhbI - putative transcriptional regulator (MarR family)	0.856303	1.81039	0.0136602
RBAM_025000	ysxB - conserved hypothetical protein	0.852733	1.80592	0.0136124
RBAM_012970	ohrB - organic hydroperoxide resistance protein (General stress protein 17o) (Gsp17o)	0.850289	1.80286	3.43991e-06
RBAM_021770	yqkD - hypothetical protein	0.850275	1.80285	0.000377562

## Sheet: down_3.0
Gene ID	Gene and Function	M	Fold-change	p_value
RBAM018030	yndH - hypothetical protein	-3.51839	-11.4588	0.0190622
RBAM008360	malA - maltose-6'-phosphate glucosid involved in maltose utilization	-3.29785	-9.83451	0.00103403
B_amylo_FZB42_4014	predicted ncRNA	-2.91344	-7.5341	0.0123376
RBAM035760	licH - 6-phospho-beta-glucosidase involved in lichenan utilization	-2.72634	-6.61774	0.0433583
RBAM012080	penP - beta-lactamase precursor involved in resistance to beta-lactam antibiotics	-2.65736	-6.30879	0.00427175
RBAM019440	yodL - hypothetical protein	-2.60842	-6.09836	0.00207144
RBAM012150	galK1 - galactokinase involved in galactose utilization	-2.45356	-5.47768	0.0112405
RBAM004120	ycnE - conserved hypothetical protein	-2.38639	-5.22848	0.00320987
RBAM035770	licA - phosphotransferase system (PTS) lichenan specific enzyme IIA component involved in lichenan uptake and phosphorylation	-2.33941	-5.06096	0.0274921
RBAM036710	iolH - inositol utilization protein H involved in myo-inositol catabolism	-2.27292	-4.83299	0.018971
RBAM018960	yocH - putative cell-wall binding protein	-2.19999	-4.59477	0.0166041
RBAM030250	liaH - conserved hypothetical protein involved in protection against daptamycin	-2.10912	-4.31427	5.00645e-05
RBAM019360	bglA - 6-phospho-beta-glucosidase involved in beta-glucoside utilization	-2.09395	-4.26916	0.0128304
RBAM015710	fapR - transcription factor (Fatty acid and phospholipid biosynthesis regulator)	-2.00479	-4.01332	0.0262695
RBAM027670	ytkA - hypothetical protein	-1.99757	-3.99328	2.59376e-07
RBAM006550	gutA - probable glucitol transport protein	-1.92496	-3.79726	0.0256384
RBAM022920	sinI - sinR antagonist	-1.92335	-3.79304	0.00744645
RBAM011340	fabF - beta-ketoacyl-acyl carrier protein synthase II involved in fatty acid biosynthesis	-1.88585	-3.69571	0.0461174
RBAM012010	hypothetical protein	-1.88146	-3.68447	0.0119048
RBAM006610	ydjI - conserved hypothetical protein	-1.80799	-3.50155	0.00982454
RBAM006180	putative transcriptional regulator (gntr family)	-1.80722	-3.49966	0.000627396
RBAM026370	argH - argininosuccinate lyase involved in biosynthesis of arginine	-1.77462	-3.42148	0.0110871
RBAM020080	degR - positive effector of DegU-phosphate stability involved in control of DegU activity	-1.75047	-3.36467	0.00430841
RBAM032460	yvyD - conserved hypothetical protein required for survival at low temperatures	-1.74577	-3.35375	0.0302981
RBAM016830	tdh - L-threonine 3-dehydrogenase involved in threonine utilization	-1.74229	-3.34566	0.0385327
RBAM026150	phoP - two-component response regulator involved in regulation of phosphate metabolism	-1.72074	-3.29605	0.00238859
RBAM019060	dhaS - aldehyde dehydrogenase	-1.6624	-3.16543	0.00180632
RBAM030260	liaI - hypothetical protein	-1.64743	-3.13275	0.000533405
RBAM011020	yitJ - conserved hypothetical protein	-1.57836	-2.98631	0.00337815
RBAM012130	galT1 - galactose-1-phosphate uridyltransferase involved in galactose utilization	-1.56581	-2.96044	0.0451218
RBAM020730	ypiF - hypothetical protein	-1.52731	-2.88248	0.00749287
RBAM016840	kbl - 2-amino-3-ketobutyrate coenzyme A ligase involved in threonine utilization	-1.51767	-2.86328	0.0150425
RBAM015190	ylmC - conserved hypothetical protein	-1.50039	-2.82918	0.00691122
RBAM019730	rapA1 - response regulator aspartate phosphatase A involved in control of sporulation initiation	-1.49757	-2.82367	0.00458256
RBAM009090	katA - vegetative catalase involved in detoxification (degradation) of hydrogen peroxide	-1.49666	-2.82189	0.0193545
RBAM014220	abh - transition state regulator	-1.49502	-2.81867	0.000439697
B_amylo_FZB42_3873	predicted ncRNA	-1.47596	-2.7817	0.000437852
RBAM031450	lutC - conserved hypothetical protein involved in utilization of lactate	-1.47474	-2.77934	0.00100988
RBAM027190	msmE - ABC transporter probably melibiose uptake	-1.4668	-2.76408	0.0325545
RBAM013890	abbA - anti-repressor involved in inhibition of AbrB	-1.46472	-2.76011	0.000437852
RBAM013790	hypothetical protein	-1.43656	-2.70675	0.00146516
RBAM020170	ypbS - hypothetical protein	-1.43024	-2.69491	0.0424039
RBAM010180	yhaL - hypothetical protein involved in sporulation	-1.42166	-2.67893	0.0184641
RBAM012470	xlyB - N-acetylmuramoyl-L-alanine amidase involved in PBSX prophage-mediated lysis	-1.42085	-2.67743	0.00291232
RBAM007980	treA - trehalose-6-phosphate hydrolase involved in trehalose utilization	-1.38606	-2.61364	0.0217242
RBAM018540	ggt - gamma-glutamyltranspeptidase involved in degradation of poly-glutamate capsules	-1.36497	-2.57571	0.00900239
RBAM036870	des - fatty acid desaturase involved in adaptation of membrane fluidity at low temperatures	-1.35952	-2.56599	0.0241059
RBAM028110	yuaG - conserved ypothetical protein involved in the early stages of sporulation	-1.35216	-2.55294	0.00100222
RBAM036760	iolC - inositol utilization protein C involved in myo-inositol catabolism	-1.34622	-2.54245	0.0335648
RBAM034560	hypothetical protein	-1.3445	-2.53943	0.0223996
RBAM021290	resA - thiol-disulfide oxidoreductase involved in cytochrome c biogenesis	-1.3377	-2.52748	0.0295967
RBAM029400	yutF - conserved hypothetical protein	-1.32979	-2.51366	0.0431025
RBAM019170	cwlS - D,L-endopeptidase, peptidoglycan hydrolase involved in cell wall metabolism	-1.32872	-2.51179	2.87241e-05
RBAM021570	spoIIAB - anti-sigma F factor involved in control of sporulation	-1.32714	-2.50905	0.00365242
RBAM020640	dapB - dihydrodipicolinate reductase involved in biosynthesis of lysine and peptidoglycan	-1.32646	-2.50787	0.0385327
RBAM005410	ydeB - conserved hypothetical protein	-1.31864	-2.49432	4.343e-05
RBAM032010	trxB - thioredoxin reductase	-1.31792	-2.49307	0.000985115
RBAM012790	dppC - dipeptide transport system permease protein involved in uptake of dipeptides	-1.3063	-2.47306	0.0207297
RBAM026510	thiI - putative thiamine biosynthesis protein	-1.29549	-2.45461	0.01023
RBAM023140	yqgV - conserved hypothetical protein	-1.28728	-2.44067	0.0385327
RBAM003400	ycbE - galactarate/glucarate transporter in (proton symport) involved in glucarate uptake	-1.2763	-2.42218	0.00107926
RBAM017790	sspO - small acid-soluble spore protein involved in protection of spore DNA	-1.27571	-2.42118	0.0321652
RBAM013630	ykvY - conserved hypothetical protein	-1.25443	-2.38573	0.0262335
RBAM012200	pgm1 - predicted phosphatase/phosphohexomutase involved in enzyme in glycolysis/gluconeogenesis	-1.2478	-2.37479	0.00900239
RBAM022350	buk - butyrate kinase involved in utilization of branched-chain keto acids	-1.24643	-2.37254	0.000114938
RBAM017340	xylR - xylose operon repressor protein involved in regulation of xylan and xylose utilization	-1.24455	-2.36944	0.0290639
RBAM036720	iolG - myo-inositol 2-dehydrogenase involved in myo-inositol catabolism	-1.23114	-2.34753	0.0129942
RBAM026760	putative transcriptional regulator	-1.22755	-2.34169	0.0153796
RBAM031470	lutA - lactate oxidase involved in lactate utilization	-1.21067	-2.31446	0.0146
RBAM002150	ybbD - putative Beta-hexosaminidase	-1.18928	-2.28038	0.00154722
RBAM036350	bglH - beta-glucosidase involved in salicin utilization	-1.17764	-2.26206	0.0392142
RBAM003380	tmrB - ATP-binding membrane protein involved in resistance to tunicamycin	-1.17713	-2.26126	0.0343842
RBAM013050	ispA - major intracellular serine protease precursor (ISP-1) involved in protein degradation	-1.17623	-2.25986	0.00813395
RBAM012410	uxaB - tagaturonate reductase (altronate oxidoreductase) involved in hexuronate utilization	-1.1728	-2.25449	0.0310943
RBAM006140	pbpE - penicillin-binding endopeptidase	-1.16737	-2.24602	0.0030672
RBAM011860	blm - beta-lactamase II precursor (Penicillinase) (Cephalosporinase)	-1.1479	-2.21592	0.00150254
RBAM018210	scoB - succinyl CoA:3-oxoacid CoA-transferase (subunit B) involved in lipid metabolism	-1.14764	-2.21551	0.00504809
RBAM012000	hypothetical protein	-1.13864	-2.20174	0.000787762
RBAM001100	mcsB - modulation of CtsR repression protein involved in regulation of protein degradation	-1.13435	-2.1952	0.000533405
RBAM022130	yqjL - putative hydrolase involved in resistence against paraquat	-1.12977	-2.18824	0.0144171
RBAM022360	bcd - leucine dehydrogenase involved in utilization of branched-chain keto acids	-1.12566	-2.18201	0.00724986
RBAM005550	hypothetical protein	-1.12524	-2.18137	3.23902e-05
RBAM016750	rodZ - morphogenic protein required for cell shape determination	-1.11656	-2.16829	0.0509012
RBAM018180	bmyA - bacillomycin D synthetase A involved in antibiotics production	-1.11375	-2.16408	0.00570863
RBAM018930	yocC - hypothetical protein	-1.1009	-2.14488	0.00335925
RBAM018470	dacC - penicillin-binding carboxypeptidase	-1.10046	-2.14423	0.000545818
RBAM003200	yceH - putative toxic anion resistance protein	-1.09643	-2.13826	0.0280712
RBAM022310	bkdB - branched-chain alpha-keto acid dehydrogenase E2 subunit (lipoamide acyltransferase) involved in utilization of branched-chain keto acids	-1.08636	-2.12338	0.000359225
RBAM022330	bkdAA - branched-chain alpha-keto acid dehydrogenase E1 subunit (2-oxoisovalerate dehydrogenase alpha) involved in utilization of branched-chain keto acids	-1.07411	-2.10543	0.000896246
RBAM020710	qcrB - menaquinol-cytochrome c reductase cytochrome b subunit involved in respiration	-1.04566	-2.06431	3.43991e-06
RBAM021850	yqzH - hypothetical protein	-1.04121	-2.05795	0.0387741
RBAM026650	hypothetical protein	-1.04119	-2.05793	0.0329068
RBAM016860	ymcA - antagonist of biofilm repression by SinR involved in regulation of biofilm formation	-1.02849	-2.03989	0.00011573
RBAM020470	ponA - bifunctional glucosyl transferase/ transpeptidase penicillin-binding proteins IA/IB	-1.01569	-2.02187	0.0377616
B_amylo_FZB42_3849	predicted ncRNA	-1.01225	-2.01705	0.00422532
RBAM006400	ydiF - putative ABC transporter ATP-binding	-1.0114	-2.01587	0.00605623
RBAM011300	med - positive regulator of comK involved in regulation of competence	-0.998054	-1.9973	3.43991e-06
RBAM021030	cmk - cytidylate kinase involved in the synthesis of CTP and dCTP	-0.991244	-1.9879	9.39008e-07
RBAM013160	ykoM - putative transcriptional regulator (MarR family)	-0.99041	-1.98675	0.00739107
RBAM005560	conserved hypothetical protein	-0.990038	-1.98624	0.00179695
RBAM027240	ytwF - conserved hypothetical protein	-0.988778	-1.9845	0.0388049
RBAM027580	pckA - phosphoenolpyruvate carboxykinase involved in synthesis of phosphoenolpyruvate	-0.968009	-1.95614	0.000272746
RBAM022970	yqzG - hypothetical protein	-0.962851	-1.94916	0.0436135
RBAM008350	sspH - small, acid-soluble spore protein involved in protection of spore DNA	-0.961047	-1.94672	0.0419126
RBAM024200	manP - phosphotransferase system (PTS) mannose-specificenzyme IIBCA component involved in mannose uptake and phosphorylation, control of ManR activity	-0.954243	-1.93756	6.62208e-05
RBAM031740	yveG - hypothetical protein	-0.950134	-1.93205	3.97088e-05
RBAM001110	clpC - class III stress response-related ATPase involved in protein degradation	-0.945825	-1.92629	0.00242375
RBAM008700	fhO - hypothetical protein	-0.943602	-1.92332	3.43991e-06
RBAM004730	gsiB - general stress protein	-0.923378	-1.89655	0.00376914
RBAM024210	manR - mannose operon Transcriptional antiterminator involved in regulation of mannose utilization	-0.916748	-1.88785	0.051303
RBAM004110	ycnD - NADPH-flavin oxidoreductase involved in delivery of FMN to enzymes	-0.914823	-1.88534	0.00499778
RBAM002170	murP - N-acetyl muramic acid-specific phosphotransferase system, EIIBC component involved in N-acetyl muramic acid uptake and phosphorylation	-0.909064	-1.87783	0.000142311
RBAM004040	yclM - aspartokinase III with unknown function	-0.903253	-1.87028	0.00233383
RBAM013620	zosA - P-type zinc-transporting ATPase involved in zinc uptake	-0.89891	-1.86466	0.019755
RBAM022370	ptb - phosphate butyryltransferase involved in utilization of branched-chain keto acids	-0.898193	-1.86373	0.000173399
B_amylo_FZB42_3895	predicted ncRNA	-0.890895	-1.85433	0.00319927
RBAM022960	yqxM - hypothetical protein involved in formation of biofilms and fruiting bodies	-0.874184	-1.83297	0.0231039
RBAM011540	pepF - oligoendopeptidase involved in protein degradation	-0.870853	-1.82874	0.000729397
RBAM020410	yppF - hypothetical protein	-0.867186	-1.8241	0.00180632
RBAM028990	yukJ - conserved hypothetical protein	-0.863815	-1.81984	0.0165958
RBAM036590	yxeA - hypothetical protein	-0.863749	-1.81976	0.0387741
RBAM017640	hypothetical protein	-0.854061	-1.80758	0.0313705
RBAM012310	yjjA - conserved hypothetical protein	-0.851065	-1.80383	0.0114505
RBAM010120	yhaR - putative enoyl CoA hydratase	-0.851057	-1.80382	0.0359218
RBAM003760	tcyC - putative ABC-type transport protein, ATPase component involved in cystine uptake	-0.850125	-1.80266	5.52613e-05
	Genes involved in carbohydrate uptake, utilization and metabolism
RBAM008360	malA - maltose-6'-phosphate glucosid involved in maltose utilization	-3.29785	-9.83451	0.00103403
RBAM035760	licH - 6-phospho-beta-glucosidase involved in lichenan utilization	-2.72634	-6.61774	0.0433583
RBAM012150	galK1 - galactokinase involved in galactose utilization	-2.45356	-5.47768	0.0112405
RBAM035770	licA - phosphotransferase system (PTS) lichenan specific enzyme IIA component involved in lichenan uptake and phosphorylation	-2.33941	-5.06096	0.0274921
RBAM036710	iolH - inositol utilization protein H involved in myo-inositol catabolism	-2.27292	-4.83299	0.018971
RBAM019360	bglA - 6-phospho-beta-glucosidase involved in beta-glucoside utilization	-2.09395	-4.26916	0.0128304
RBAM006550	gutA - probable glucitol transport protein	-1.92496	-3.79726	0.0256384
RBAM012130	galT1 - galactose-1-phosphate uridyltransferase involved in galactose utilization	-1.56581	-2.96044	0.0451218
RBAM027190	msmE - ABC transporter probably melibiose uptake	-1.4668	-2.76408	0.0325545
RBAM007980	treA - trehalose-6-phosphate hydrolase involved in trehalose utilization	-1.38606	-2.61364	0.0217242
RBAM036760	iolC - inositol utilization protein C involved in myo-inositol catabolism	-1.34622	-2.54245	0.0335648
RBAM003400	ycbE - galactarate/glucarate transporter in (proton symport) involved in glucarate uptake	-1.2763	-2.42218	0.00107926
RBAM036720	iolG - myo-inositol 2-dehydrogenase involved in myo-inositol catabolism	-1.23114	-2.34753	0.0129942
RBAM002150	ybbD - putative Beta-hexosaminidase	-1.18928	-2.28038	0.00154722
RBAM036350	bglH - beta-glucosidase involved in salicin utilization	-1.17764	-2.26206	0.0392142
RBAM024200	manP - phosphotransferase system (PTS) mannose-specificenzyme IIBCA component involved in mannose uptake and phosphorylation, control of ManR activity	-0.954243	-1.93756	6.62208e-05
RBAM002170	murP - N-acetyl muramic acid-specific phosphotransferase system, EIIBC component involved in N-acetyl muramic acid uptake and phosphorylation	-0.909064	-1.87783	0.000142311
